# Supplementary material for: Intravenous Thrombolysis in Patients with Stroke Taking Rivaroxaban Using Drug Specific Plasma Levels: Experience with a Standard Operation Procedure in Clinical Practice
Source: PubMed Central journal article supplement — J Stroke. 2017 Sep 6;19(3):347–55. doi: 10.5853/jos.2017.00395 (PMC5647628; doi:10.5853/jos.2017.00395), 2017-09-06
Supplement: jos-2017-00395-suppl.pdf [file jos-2017-00395-suppl.pdf]

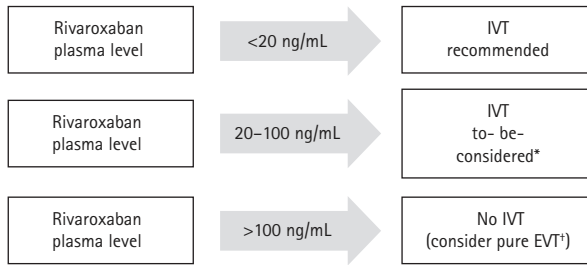

**Supplementary Figure 1.** Standard operating procedure (SOP) Stroke Center University Hospital Basel for selection of patients with acute ischemic stroke taking Rivaroxaban for treatment with intravenous thrombolysis (IVT) and endovascular treatment (EVT) based on rivaroxaban plasma levels. \*Consider no IVT if mild stroke  $\text{NIHSS} \leq 4$  or comorbidities; †Consider EVT if proximal vessel occlusion is present. NIHSS, National Institutes of Health Stroke Scale.
